# Supplementary material for: Mycotoxin Profile and Phylogeny of Pathogenic Alternaria Species Isolated from Symptomatic Tomato Plants in Lebanon
Source: MDPI journal article supplement (doi:10.3390/toxins13080513), 2021-07-22
Supplement: s1 [file s1]

**Table S1.** GenBank accession numbers of *Alternaria* strain sequences obtained in the present study.

| Strain     | Species                         | Accession Number |            |             |            |
|------------|---------------------------------|------------------|------------|-------------|------------|
|            |                                 | <i>Alt-a1</i>    | <i>tub</i> | <i>calm</i> | <i>gpd</i> |
| Altern1321 | <i>Alternaria arborescens</i>   | OU407647         | OU407696   | OU407745    | OU407794   |
| Altern1322 | <i>Alternaria arborescens</i>   | OU407648         | OU407697   | OU407746    | OU407795   |
| Altern1323 | <i>Alternaria mali</i>          | OU407649         | OU407698   | OU407747    | OU407796   |
| Altern1324 | <i>Alternaria mali</i>          | OU407650         | OU407699   | OU407748    | OU407797   |
| Altern1325 | <i>Alternaria alternata</i>     | OU407651         | OU407700   | OU407749    | OU407798   |
| Altern1326 | <i>Alternaria alternata</i>     | OU407652         | OU407701   | OU407750    | OU407799   |
| Altern1327 | <i>Alternaria alternata</i>     | OU407653         | OU407702   | OU407751    | OU407800   |
| Altern1328 | <i>Alternaria alternata</i>     | OU407654         | OU407703   | OU407752    | OU407801   |
| Altern1329 | <i>Alternaria alternata</i>     | OU407655         | OU407704   | OU407753    | OU407802   |
| Altern1330 | <i>Alternaria arborescens</i>   | OU407656         | OU407705   | OU407754    | OU407803   |
| Altern1331 | <i>Alternaria alternata</i>     | OU407657         | OU407706   | OU407755    | OU407804   |
| Altern1332 | <i>Alternaria mali</i>          | OU407658         | OU407707   | OU407756    | OU407805   |
| Altern1333 | <i>Alternaria alternata</i>     | OU407659         | OU407708   | OU407757    | OU407806   |
| Altern1334 | <i>Alternaria arborescens</i>   | OU407660         | OU407709   | OU407758    | OU407807   |
| Altern1335 | <i>Alternaria alternata</i>     | OU407661         | OU407710   | OU407759    | OU407808   |
| Altern1336 | <i>Alternaria alternata</i>     | OU407662         | OU407711   | OU407760    | OU407809   |
| Altern1337 | <i>Alternaria alternata</i>     | OU407663         | OU407712   | OU407761    | OU407810   |
| Altern1338 | <i>Alternaria alternata</i>     | OU407664         | OU407713   | OU407762    | OU407811   |
| Altern1339 | <i>Alternaria mali</i>          | OU407665         | OU407714   | OU407763    | OU407812   |
| Altern1340 | <i>Alternaria mali</i>          | OU407666         | OU407715   | OU407764    | OU407813   |
| Altern1341 | <i>Alternaria alternata</i>     | OU407667         | OU407716   | OU407765    | OU407814   |
| Altern1342 | <i>Alternaria mali</i>          | OU407668         | OU407717   | OU407766    | OU407815   |
| Altern1343 | <i>Alternaria alternata</i>     | OU407669         | OU407718   | OU407767    | OU407816   |
| Altern1344 | <i>Alternaria mali</i>          | OU407670         | OU407719   | OU407768    | OU407817   |
| Altern1345 | <i>Alternaria alternata</i>     | OU407671         | OU407720   | OU407769    | OU407818   |
| Altern1346 | <i>Alternaria alternata</i>     | OU407672         | OU407721   | OU407770    | OU407819   |
| Altern1347 | <i>Alternaria alternata</i>     | OU407673         | OU407722   | OU407771    | OU407820   |
| Altern1348 | <i>Alternaria mali</i>          | OU407674         | OU407723   | OU407772    | OU407821   |
| Altern1349 | <i>Alternaria arborescens</i>   | OU407675         | OU407724   | OU407773    | OU407822   |
| Altern1350 | <i>Alternaria limoniasperae</i> | OU407676         | OU407725   | OU407774    | OU407823   |
| Altern1351 | <i>Alternaria alternata</i>     | OU407677         | OU407726   | OU407775    | OU407824   |
| Altern1352 | <i>Alternaria mali</i>          | OU407678         | OU407727   | OU407776    | OU407825   |
| Altern1353 | <i>Alternaria alternata</i>     | OU407679         | OU407728   | OU407777    | OU407826   |
| Altern1354 | <i>Alternaria arborescens</i>   | OU407680         | OU407729   | OU407778    | OU407827   |
| Altern1355 | <i>Alternaria arborescens</i>   | OU407681         | OU407730   | OU407779    | OU407828   |
| Altern1356 | <i>Alternaria alternata</i>     | OU407682         | OU407731   | OU407780    | OU407829   |
| Altern1358 | <i>Alternaria arborescens</i>   | OU407683         | OU407732   | OU407781    | OU407830   |
| Altern1359 | <i>Alternaria arborescens</i>   | OU407684         | OU407733   | OU407782    | OU407831   |
| Altern1360 | <i>Alternaria alternata</i>     | OU407685         | OU407734   | OU407783    | OU407832   |
| Altern1361 | <i>Alternaria alternata</i>     | OU407686         | OU407735   | OU407784    | OU407833   |
| Altern1362 | <i>Alternaria alternata</i>     | OU407687         | OU407736   | OU407785    | OU407834   |
| Altern1363 | <i>Alternaria alternata</i>     | OU407688         | OU407737   | OU407786    | OU407835   |
| Altern1364 | <i>Alternaria arborescens</i>   | OU407689         | OU407738   | OU407787    | OU407836   |
| Altern1365 | <i>Alternaria mali</i>          | OU407690         | OU407739   | OU407788    | OU407837   |
| Altern1366 | <i>Alternaria mali</i>          | OU407691         | OU407740   | OU407789    | OU407838   |
| Altern1367 | <i>Alternaria citriarbusti</i>  | OU407692         | OU407741   | OU407790    | OU407839   |
| Altern1368 | <i>Alternaria arborescens</i>   | OU407693         | OU407742   | OU407791    | OU407840   |
| Altern1369 | <i>Alternaria alternata</i>     | OU407694         | OU407743   | OU407792    | OU407841   |
| Altern1370 | <i>Alternaria arborescens</i>   | OU407695         | OU407744   | OU407793    | OU407842   |
